# Supplementary material for: Disruption of polyunsaturated fatty acid biosynthesis drives STING-dependent acute myeloid leukemia cell maturation and death
Source: PubMed Central journal article supplement (PMC11061745; doi:10.1016/j.jbc.2024.107214), 2024-03-22

# Figure S2

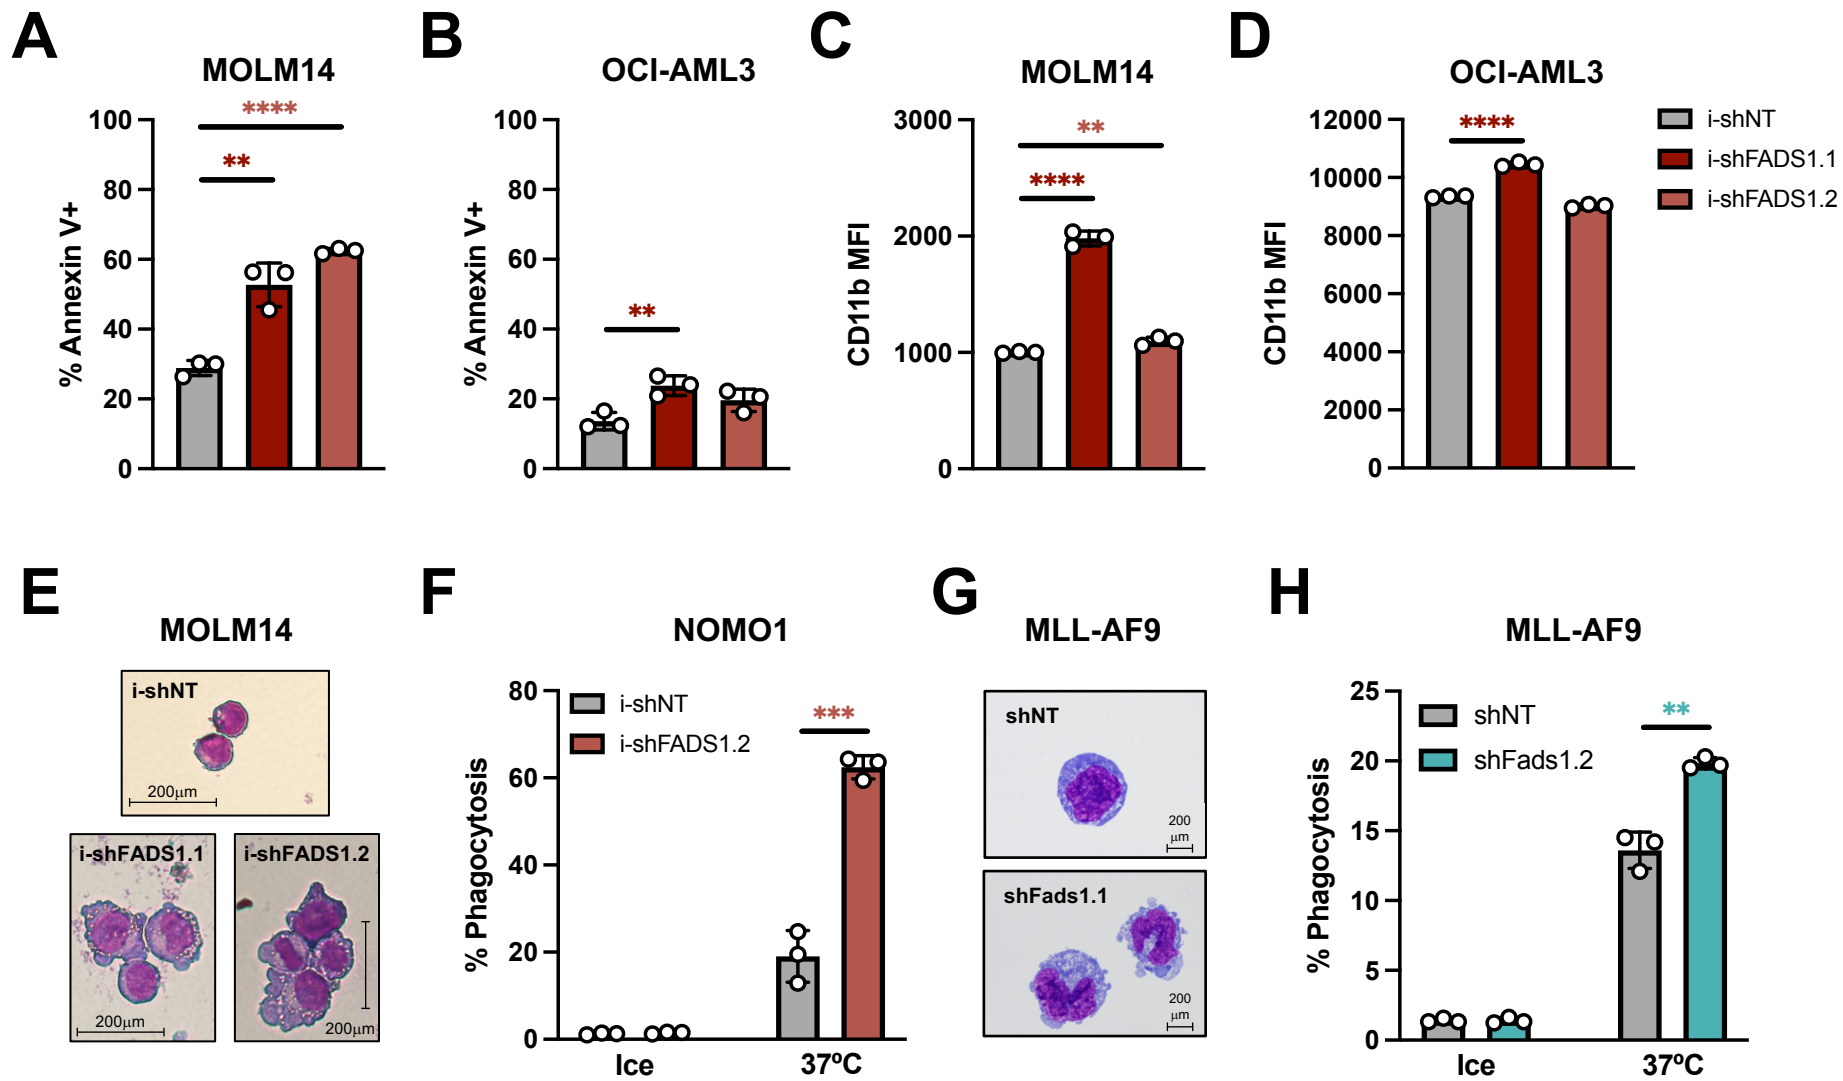

Supplement: mmc2.pdf [file mmc2.pdf]
