# Supplementary material for: Disruption of polyunsaturated fatty acid biosynthesis drives STING-dependent acute myeloid leukemia cell maturation and death
Source: PubMed Central journal article supplement (PMC11061745; doi:10.1016/j.jbc.2024.107214), 2024-03-22

## A

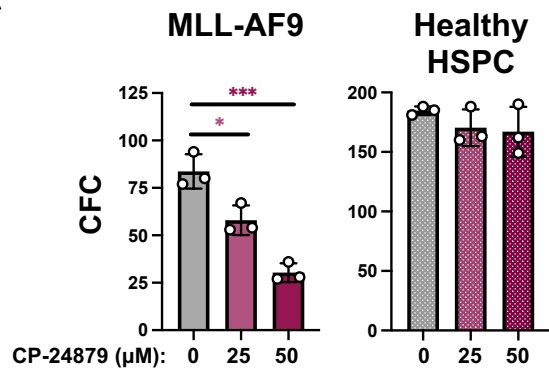

## D

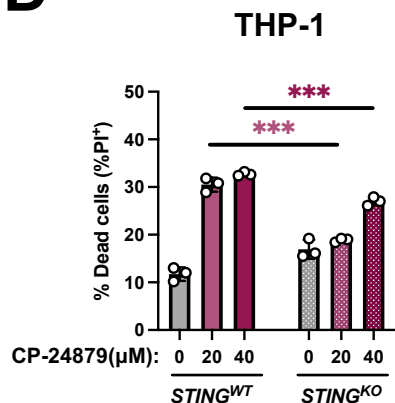

## E

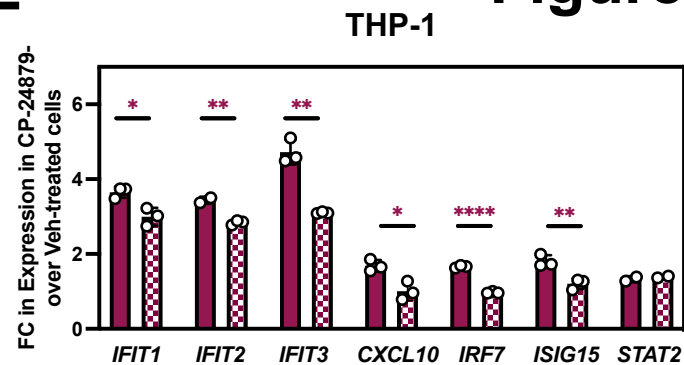

## B

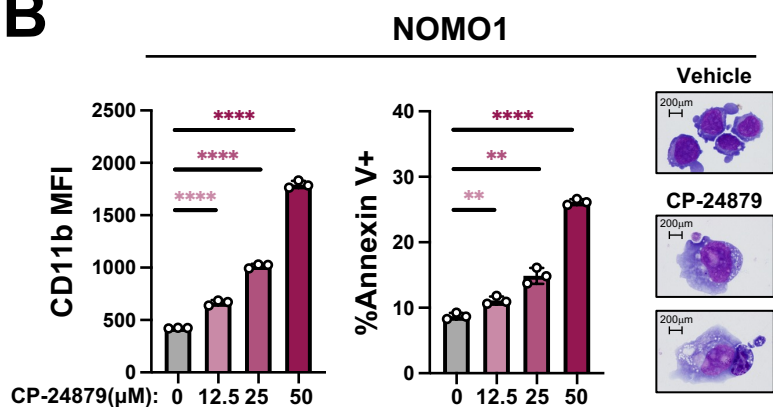

## F

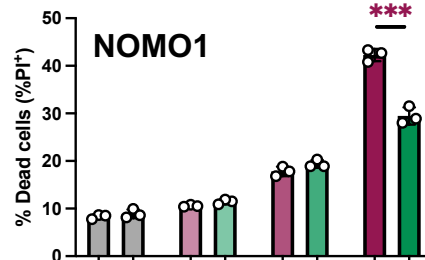

## G

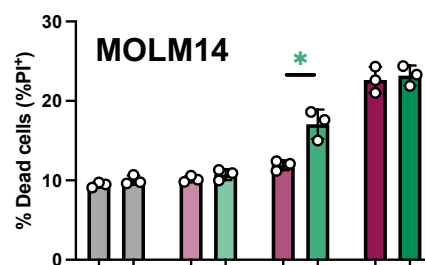

## H

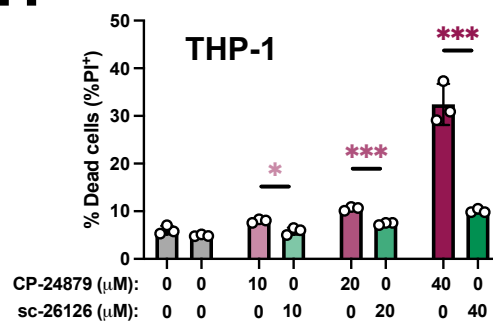

## I

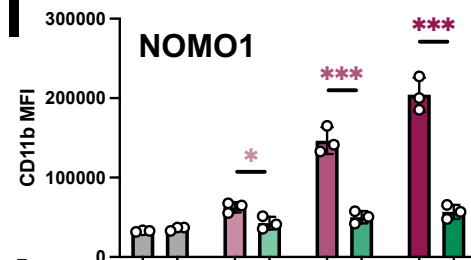

## J

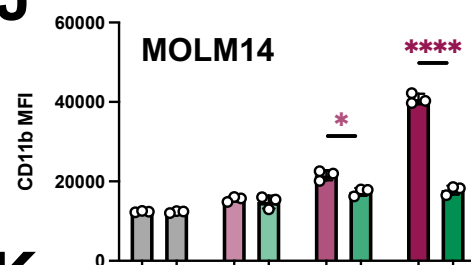

## K

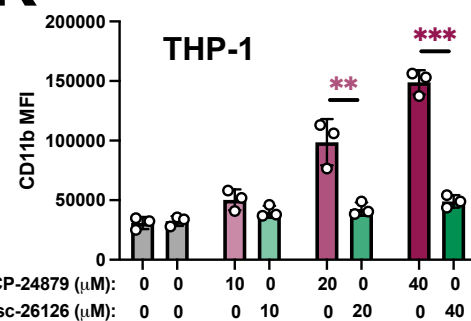

## C

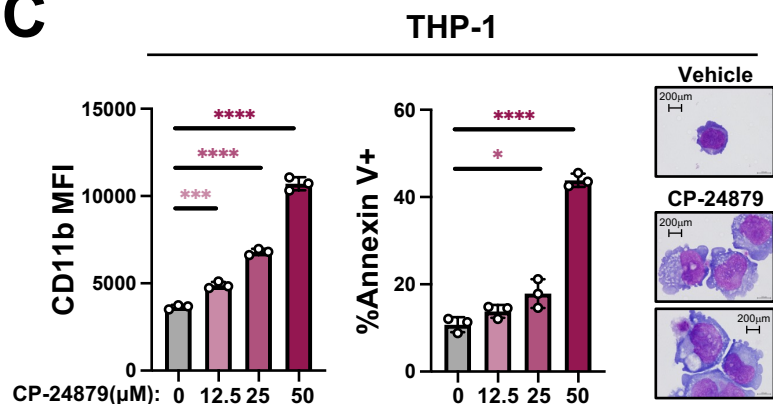

Supplement: mmc5.pdf [file mmc5.pdf]
