# Supplementary material for: Disruption of polyunsaturated fatty acid biosynthesis drives STING-dependent acute myeloid leukemia cell maturation and death
Source: PubMed Central journal article supplement (PMC11061745; doi:10.1016/j.jbc.2024.107214), 2024-03-22

## A

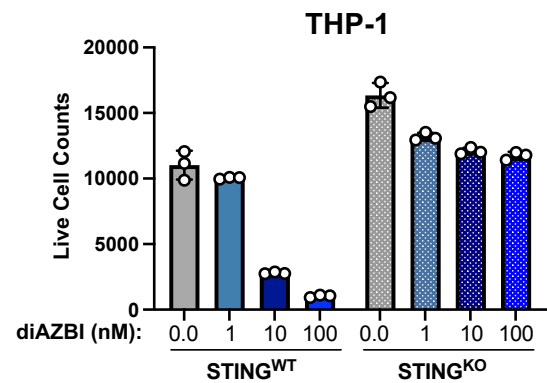

## H

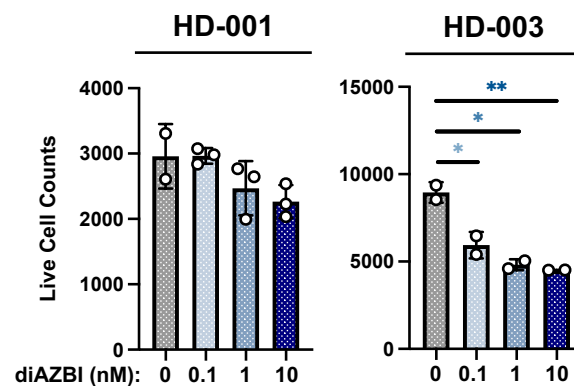

## B

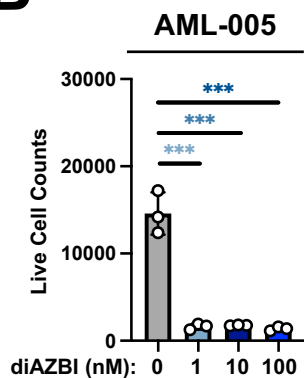

## C

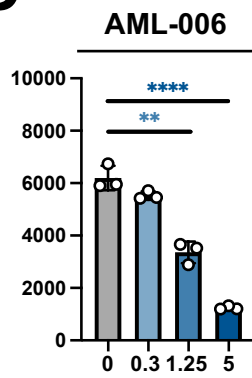

## D

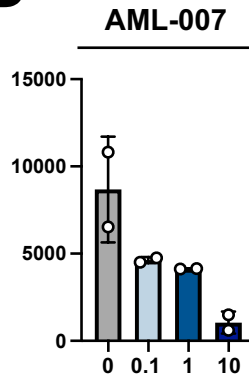

## I

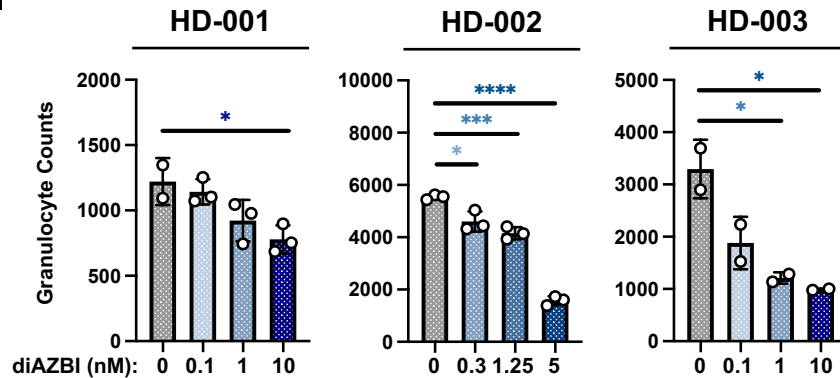

## E

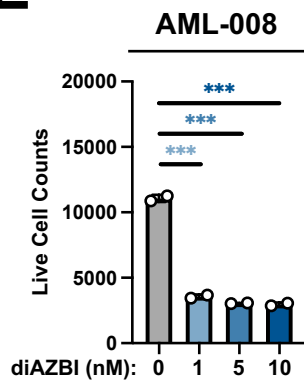

## F

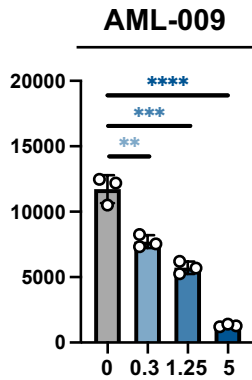

## G

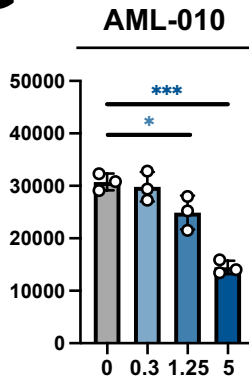

## J

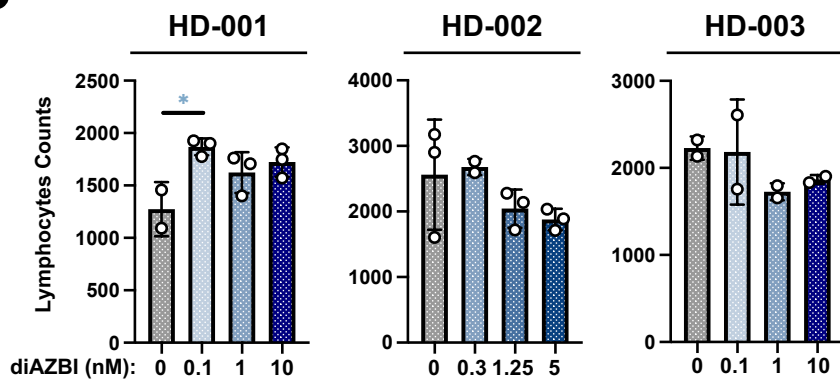

Supplement: mmc7.pdf [file mmc7.pdf]
