# Supplementary material for: Disruption of polyunsaturated fatty acid biosynthesis drives STING-dependent acute myeloid leukemia cell maturation and death
Source: PubMed Central journal article supplement (PMC11061745; doi:10.1016/j.jbc.2024.107214), 2024-03-22

## A

NOMO1 Dose-response Matrix

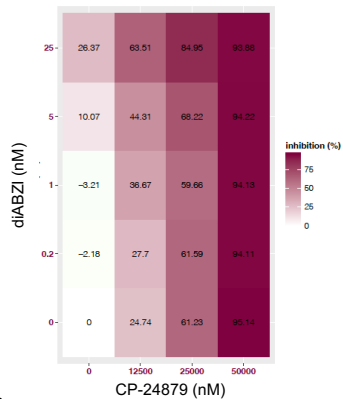

NOMO1

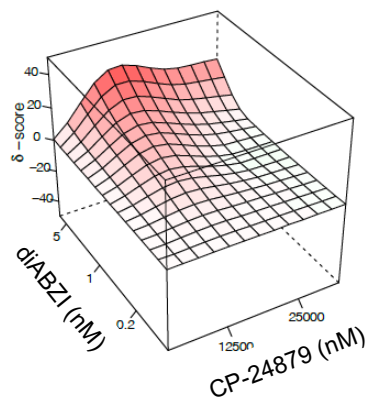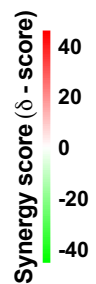

## B

THP-1 Dose-response Matrix

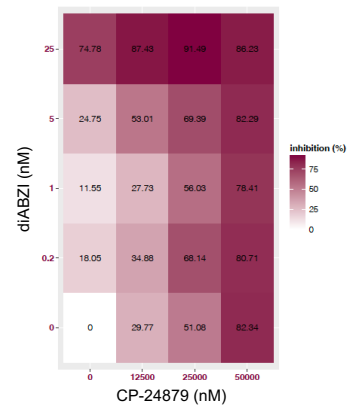

THP-1

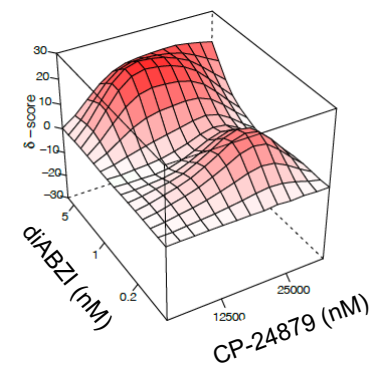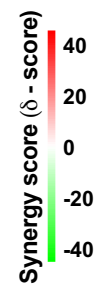

## C

OCI-AML2 Dose-response Matrix

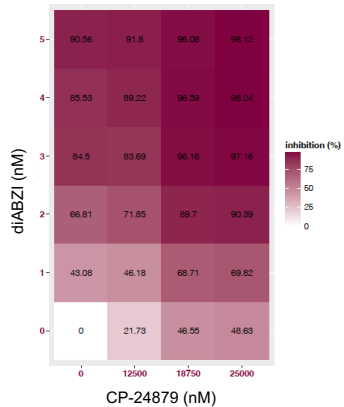

OCI-AML2

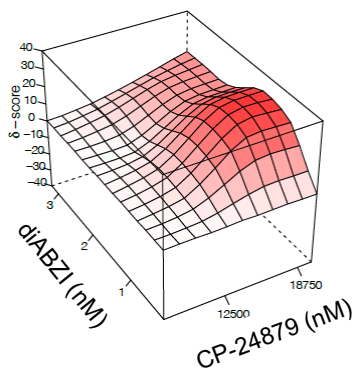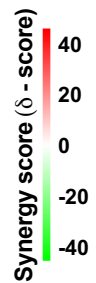

## D

OCI-AML3 Dose-response Matrix

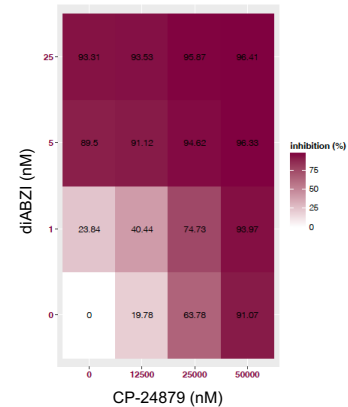

OCI-AML3

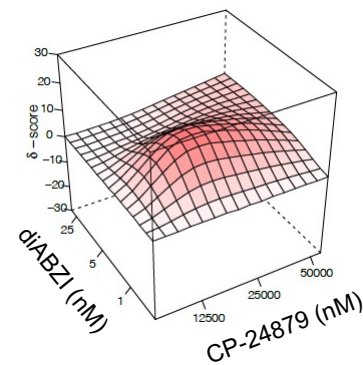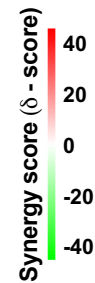

Supplement: mmc8.pdf [file mmc8.pdf]
