# Supplementary material for: Disruption of polyunsaturated fatty acid biosynthesis drives STING-dependent acute myeloid leukemia cell maturation and death
Source: PubMed Central journal article supplement (PMC11061745; doi:10.1016/j.jbc.2024.107214), 2024-03-22
Supplement: mmc13.pdf [file mmc13.pdf]

## Supplementary Information

# DISRUPTION OF POLYUNSATURATED FATTY ACID BIOSYNTHESIS DRIVES STING-DEPENDENT ACUTE MYELOID LEUKEMIA CELL MATURATION AND DEATH

Joice Kanefsky<sup>1#</sup>, Mary Basse<sup>2#</sup>, Judith Sokei<sup>2</sup>, Orsola di Martino<sup>2</sup>, Liana Valin<sup>2</sup>, Yorrick Jaspers<sup>3</sup>, Esteban Martinez<sup>1</sup>, Jacklyn Huhn<sup>1</sup>, Daniela Di Marcantonio<sup>1</sup>, Jeffrey A. Magee<sup>2</sup>, Aaron R. Goldman<sup>4</sup>, Hsin-Yao Tang<sup>4</sup>, Francesca Ferraro<sup>2</sup>, Stephan Kemp<sup>3</sup>, David L. Wiest<sup>1\*+</sup>, Stephen M. Sykes<sup>2\*+</sup>

<sup>1</sup> Fox Chase Cancer Center, Temple University Health System, Philadelphia, PA, USA

<sup>2</sup> Washington University in Saint Louis, School of Medicine, Department of Medicine, St. Louis, MO, USA

<sup>3</sup> Amsterdam University Medical Centers, Amsterdam, NH, Netherlands

<sup>4</sup> Proteomics & Metabolomics Facility, Wistar Institute, Philadelphia, PA, USA.

\* [s.m.sykes@wustl.edu](mailto:s.m.sykes@wustl.edu)

\* [david.wiest@fccc.edu](mailto:david.wiest@fccc.edu)

# These authors contributed equally to this work

+ These authors contributed equally to this work

| <b>Gene.symbol</b> | <b>logFC</b> | <b>adj.P.Val</b> |
|--------------------|--------------|------------------|
| HACD1              | 2.90608033   | 8.30E-05         |
| FADS1              | 2.73760524   | 1.96E-07         |
| TECR               | 2.37430931   | 3.51E-07         |
| ACOT7              | 1.68095802   | 3.05E-03         |
| FASN               | 1.51918074   | 1.04E-04         |
| ECHS1              | 1.3888164    | 6.17E-07         |
| ACACA              | 1.17852022   | 4.97E-06         |
| MCAT               | 1.14915748   | 1.89E-03         |
| FADS2              | 1.08785083   | 1.26E-03         |
| HSD17B12           | 1.0495052    | 8.34E-04         |
| HACD2              | 1.03469773   | 1.40E-03         |
| ECH1               | 0.98207123   | 2.04E-07         |
| SCD                | 0.88420302   | 3.20E-01         |
| ACAA2              | 0.74720751   | 5.03E-03         |
| OXSM               | 0.63671344   | 9.41E-02         |
| ELOVL6             | 0.5429308    | 3.74E-01         |
| FADS3              | 0.54058976   | 4.89E-02         |
| SCD5               | 0.525086     | 5.95E-01         |
| ACLY               | 0.25916356   | 2.92E-01         |
| ACSL3              | 0.25853365   | 3.29E-01         |
| ACOT11             | 0.23521916   | 3.22E-01         |
| ACOX3              | 0.21786374   | 2.86E-01         |
| ELOVL1             | 0.12682143   | 6.88E-01         |
| ACSL5              | 0.09982112   | 7.97E-01         |
| ELOVL5             | 0.07340468   | 7.66E-01         |
| ECHDC2             | 0.05665133   | 9.29E-01         |
| ELOVL4             | 0.04786558   | 8.23E-01         |
| ACSL6              | 0.02632591   | 7.55E-01         |
| ACOX1              | 0.01249551   | 8.83E-01         |
| ELOVL2             | 0.00788475   | 9.39E-01         |
| BAAT               | 0.00360875   | 9.58E-01         |
| OLAH               | -0.0001645   | 9.98E-01         |
| ECHDC3             | -0.1563855   | 5.04E-01         |
| ACAA1              | -0.3578558   | 9.19E-02         |
| ACSL1              | -2.9955965   | 8.89E-06         |

**Table S1.** Fatty acid synthetic genes presented in figure 1B. Gene expression data collected from [1] via the Gene Expression Omnibus (Series GSE 9476, Platform GPL96).

| Patient Sample | Tissue | Age | Sex | Dx   | Genetics [VAF]                                                                                                                                                                             |
|----------------|--------|-----|-----|------|--------------------------------------------------------------------------------------------------------------------------------------------------------------------------------------------|
| AML-001        | BM     | 68  | M   | AML  | CEBPA <sup>K352R</sup> [42.6%]; DNMT3A <sup>N501M;fs57*</sup> [34.9%]; U2AF1 <sup>P301Q;fs44*</sup> [81.6%]; UBA1 <sup>Q157R</sup> [42.6%]                                                 |
| AML-002        | PB     | 69  | M   | MDS  | PHF6 <sup>G12D</sup> [19.3%]; RAD21 <sup>D61V</sup> [2.9%]; SETBP1 <sup>G199R</sup> [40.3%]; SMC1A <sup>R625C</sup> [46.1%]; SMC3 <sup>R160H</sup> [97.2%]; U2AF1 <sup>R248Q</sup> [96.2%] |
| AML-003        | BM     | 60  | F   | AML  | NOTCH1 <sup>I679D;fs21*</sup> [2.1%]; SETBP1 <sup>P113S</sup> [47.4%]                                                                                                                      |
| AML-004        | BM     | 86  | M   | AML  | ASXL1 <sup>E635R;fs15*</sup> [43.2%]; PHF6 <sup>G12S</sup> [6.0%]; RAD21 <sup>E76K</sup> [14.2%]; SETBP1 <sup>S141A;142insDATF</sup> [37.6%]                                               |
| AML-005        | BM     | 81  | M   | AML  | FLT3 <sup>ITD (612insDDLKWEFPRENLEF)</sup> [37.8%]; NPM1 <sup>W288C;fs12*</sup> [42.2%]; SMC1A <sup>R586Q</sup> [46.1%]; TET2 <sup>S407F;fs20*/Q1138*</sup> [45.8%;45.3%]                  |
| AML-006        | BM     | 62  | M   | AML  | DNMT3A <sup>R882H</sup> [33.6%]; IDH2 <sup>R127K</sup> [22.1%]; SMC3 <sup>K311E</sup> [20.5%]                                                                                              |
| AML-007        | BM     | 48  | F   | tAML | FLT3 <sup>D835Y/dupG583-D593</sup> [20.6%/6.5%]; IDH2 <sup>R140Q</sup> [28.2%]; NRAS <sup>G13D</sup> [2.1%];                                                                               |
| AML-008        | BM     | 52  | F   | AML  | IDH2 <sup>R140Q</sup> [45.7%]; NRAS <sup>W288C;fs12*</sup> [43.0%];                                                                                                                        |
| AML-009        | PB     | 71  | F   | AML  | Complex Karyotype                                                                                                                                                                          |
| AML-010        | BM     | 60  | F   | AML  | NOTCH1 <sup>Y333*</sup> [46.0%]; U2AF1 <sup>R248Q</sup> [77.3%]                                                                                                                            |
| HD-001         | BM     | 42  | F   | N/A  | N/A                                                                                                                                                                                        |
| HD-002         | BM     | 35  | F   | N/A  | N/A                                                                                                                                                                                        |
| HD-003         | BM     | 34  | F   | N/A  | N/A                                                                                                                                                                                        |

**Table S2.** AML patient and healthy donor characteristics (MDS = Myelodysplastic Syndrome; tAML = therapy-related AML).

| Gene   | Cell line | SKNO1 | MOLM13 | MOLM14 | OCI-AML2 | HEL | OCI-AML4 | OCIM2 | ME1 | TF1 | OCIM1 | SET2 | SIGM5 | EOL1 | CMK | PLB985 | P31FUJ | KASUMI6 | CMK115 | GDM1 |   |
|--------|-----------|-------|--------|--------|----------|-----|----------|-------|-----|-----|-------|------|-------|------|-----|--------|--------|---------|--------|------|---|
| GBP2   |           |       |        |        |          |     |          |       |     |     |       | ✓    |       |      |     |        |        |         |        |      |   |
| HLA-A  |           |       |        |        |          |     |          |       |     |     |       |      |       |      |     | ✓      |        |         |        |      |   |
| HLA-B  |           |       |        |        |          |     |          |       |     | ✓   |       |      |       |      |     |        |        |         |        |      |   |
| HLA-E  |           |       |        |        |          |     |          |       |     |     |       |      |       |      |     |        |        |         |        | ✓    |   |
| HLA-F  |           |       |        |        |          |     |          |       |     |     |       |      |       | ✓    |     |        |        |         |        |      |   |
| HLA-G  |           |       |        |        | ✓        | ✓   |          |       |     |     |       |      |       |      |     |        |        |         |        |      |   |
| IFITM3 |           |       |        |        |          |     |          |       |     |     |       |      |       |      | ✓   |        |        |         |        |      |   |
| IFNA16 |           |       |        |        |          |     |          |       | ✓   |     |       |      |       |      |     |        |        |         |        |      |   |
| IFNAR2 |           |       |        |        |          |     |          |       |     |     |       |      |       |      |     |        |        | ✓       |        |      |   |
| IFNB1  |           |       |        |        |          |     | ✓        |       |     |     |       |      |       |      |     |        |        |         |        |      |   |
| IRF4   |           |       |        |        |          |     |          |       |     |     |       |      |       |      |     |        | ✓      |         |        |      |   |
| IRF6   |           |       |        |        |          |     |          |       |     |     |       |      |       |      |     |        |        |         |        | ✓    |   |
| JAK1   |           |       |        |        |          |     |          |       |     |     | ✓     |      |       |      |     |        |        |         |        |      |   |
| MAVS   |           |       |        |        |          |     |          | ✓     |     |     |       |      |       |      |     |        |        |         |        |      |   |
| MX1    |           |       |        |        |          |     |          |       |     |     |       | ✓    |       |      |     |        |        |         |        |      |   |
| MX2    |           |       |        |        |          | ✓   |          |       |     |     |       |      |       |      |     |        |        |         |        |      |   |
| NFKB1  |           |       |        |        |          |     |          |       |     |     |       |      |       |      |     |        |        |         |        |      | ✓ |
| NLRC5  | ✓         |       |        |        |          |     |          |       |     |     |       |      |       |      |     |        |        |         |        |      |   |
| OAS3   |           | ✓     | ✓      |        |          |     |          |       |     |     |       |      |       |      |     |        |        |         |        |      |   |
| RELA   |           |       |        |        |          |     |          |       |     |     |       |      |       |      |     | ✓      |        |         |        |      |   |
| STING1 |           |       |        |        |          |     |          |       |     |     |       | ✓    |       |      |     |        |        |         |        |      |   |
| IFNAR1 |           |       |        |        | ✓        |     |          |       |     |     |       |      |       |      |     |        |        |         |        |      |   |

**Table S3.** Genes of the type-1 interferon pathway are shown in the first column and various AML cell lines are represented in the following columns. A shaded cell (pink) with a check mark signifies that given cell line contains a mutation in the select gene. All data was extracted from the DepMap Portal (<https://depmap.org/portal/interactive/>).

| qPCR primers |         |                         |
|--------------|---------|-------------------------|
| Gene         |         | Sequence 5' -> 3'       |
| IRF7         | Forward | CCACGCTATACCATCTACCTGG  |
|              | Reverse | GCTGCTATCCAGGGAAGACACA  |
| STAT2        | Forward | CAGGTCACAGAGTTGCTACAGC  |
|              | Reverse | CGGTGAACTTGCTGCCAGTCTT  |
| IFIT1        | Forward | GCCTTGCTGAAGTGTGGAGGAA  |
|              | Reverse | ATCCAGGCGATAGGCAGAGATC  |
| IFIT2        | Forward | GGAGCAGATTCTGAGGCTTTGC  |
|              | Reverse | GGATGAGGCTTCCAGACTCCAA  |
| IFIT3        | Forward | CCTGGAATGCTTACGGCAAGCT  |
|              | Reverse | GAGCATCTGAGAGTCTGCCAA   |
| ISIG15       | Forward | CTCTGAGCATCCTGGTGAGGAA  |
|              | Reverse | AAGGTCAGCCAGAACAGGTCGT  |
| CXCL10       | Forward | GGTGAGAAGAGATGTCTGAATCC |
|              | Reverse | GTCCATCCTTGGAAGCACTGCA  |

**Table S4.** List of qPCR primers used throughout the study.

## Supplemental Figure Legends

**Figure S1. Genetic inhibition of FADS1 antagonizes the expansion of mouse and human AML cells *in vitro* and *in vivo*.** **(A)** Comparison of FADS1 mRNA levels between AML cases bearing wild-type FLT3 (FLT3-WT) and FLT3 internal tandem duplication (FLT3-ITD). The data was extracted from two independent cohorts [2], [3] using the Leukemia Gene Atlas. **(B)** FACS-purified GFP<sup>+</sup> MLL-AF9 cells expressing shNT or shFads1.2 were cultured in cytokine-enriched methylcellulose and colonies were enumerated after 7 days (\*\*\*\* $p < 0.0001$ ). **(C)** *In vitro* growth curve for mouse MLL-AF9 leukemia cells. Data points represent the fold change in GFP% over day 3 for each condition (MLL-AF9-shNT vs. shFads1.1: Day 5, \*\*\*\* $p < 0.0001$ ; Day 7, \*\*\*\* $p < 0.0001$ ; Day 10, \*\*\* $p = 0.0003$ ; and MLL-AF9-shNT vs. shFads1.2: Day 7, \*\*\* $p = 0.0003$ ; Day 10, \*\*\* $p = 0.0004$ ). **(D)** FACS-purified GFP<sup>+</sup> MLL-AF9 cells expressing shNT, shFads1.1 (*top panel*) or shFads1.2 (*bottom panel*) were cultured in cytokine-enriched methylcellulose with vehicle or 20 $\mu$ M Arachidonic Acid (AA). Colonies were then enumerated after 7 days (shFads1.1-vehicle vs. -20 $\mu$ M AA,  $p^{**} = 0.0065$  and shFads1.2-vehicle vs. -20 $\mu$ M AA,  $p^{***} = 0.0004$ ). **(E)** Flow cytometric analysis of MLL-AF9 bone marrow cells recovered from leukemic mice depicting the percentage of GFP<sup>+</sup> (shRNA-expressing) cells per mouse (shNT vs. shFads1.1,  $p = 0.0111$  and shNT vs. shFads1.2,  $p = 0.019$ ). **(F & G)** Western blot analysis of FACS-purified (F) OCI-AML3 cells or (G) MOLM14 expressing control i-shNT, i-shFADS1.1, or i-shFADS1.2. **(H & I)** Relative growth of (H) OCI-AML3 and (I) MOLM14 single cell clones expressing i-shNT, human-targeting i-shFADS1.1 or i-shFADS1.2. Counting beads were used as reference during flow cytometric analysis at the indicated

time points (OCI-AML3: i-shNT vs. i-shFADS1.1, \*\*\*\* $p < 0.0001$ ; i-shNT vs. i-shFADS1.2, \*\* $p = 0.017$ ; and MOLM14: i-shNT vs. i-shFADS1.1, \*\* $p = 0.0039$ ; i-shNT vs. i-shFADS1.2, \*\* $p = 0.0034$ ). Dots represent individual data points and error bars represent SD.

**Figure S2. FADS1 knockdown leads to AML cell cycle arrest, maturation and death.**

**(A-B)** MOLM14 (A) or OCI-AML3 (B) expressing i-shNT or i-shFADS1.1 were analyzed for %Annexin V<sup>+</sup> by flow cytometry, 5 days post-DOX (MOLM14: i-shNT vs. i-shFADS1.1, \*\* $p = 0.0034$ ; i-shNT vs. i-shFADS1.2, \*\*\*\* $p < 0.0001$ ; and OCI-AML3: i-shNT vs. i-shFADS1.1, \*\* $p = 0.0094$ ). **(C-D)** Flow cytometric analysis of MOLM14 (C) and OCI-AML3 (D) single cell clones for the expression of the myeloid marker CD11b by flow cytometry, 5 days post-DOX (MOLM14: i-shNT vs. i-shFADS1.1, \*\*\*\* $p < 0.0001$ ; i-shNT vs. i-shFADS1.2, \*\* $p = 0.0094$ ; and OCI-AML3: i-shNT vs. i-shFADS1.1, \*\*\*\* $p < 0.0001$ ). **(E)** Wright-Giemsa staining of MOLM14 cells expressing i-shNT, i-shFADS1.1, or i-shFADS1.2 shRNAs at 5 days post doxycycline induction (20x magnification). **(F)** Percent of internalized fluorescently labeled (PE) *E. coli* peptides by NOMO1 cells expressing i-shNT or i-shFADS1.2. Measurements were taken on day 5 post-doxycycline induction (i-shNT vs. i-shFADS1.2 at 37°C, \*\*\* $p = 0.0003$ ). **(G)** Wright-Giemsa staining of FACS-purified MLL-AF9 cells expressing shNT or shFads1.1 (100x magnification). **(H)** Percent of internalized fluorescently labeled (PE) *E. coli* peptides by MLL-AF9 cells expressing shNT or shFads1.2 as measured by flow cytometry at day 9 days post-transduction (shNT vs. i-shFads1.2 at 37°C, \*\* $p = 0.0014$ ).

**Figure S3. FADS1 inhibition selectively depletes 20:4 fatty acid in storage lipids.**

**(A)** Ratios of total signals from phospholipids containing 20:4 or 20:3 FA in the sn-2 position for MOLM14 cells ( $p=0.0005$ ). **(B)** Analysis of fatty acid composition for shFADS1 vs. control shNT cells based on the total MS signal (lipid abundance) with the specified total degree of unsaturation for MOLM14 cells. **(C)** Total signal intensity (*left panel*) and signal intensity for Cholesteryl Esters containing a 20:4 fatty acid in the sn-2 position (*right panel*) for NOMO1 and MOLM14 cells (NOMO1, i-shNT vs. i-shFADS1.1, total ChE,  $**p=0.007$ ; i-shNT vs. i-shFADS1.2, total ChE,  $***p=0.0003$ ; i-shNT vs. i-shFADS1.1, 20:4 sn-2 ChE,  $*p=0.0165$ ; and MOLM14, i-shNT vs. i-shFADS1.1, 20:4 sn-2 ChE,  $*p=0.0342$ ). **(D & E)** Total signal intensity (*left panel*), signal intensity for Triglycerides containing a 20:4 fatty acid (*middle panel*) or a 20:5 fatty acid (*right panel*) in the sn-2 position for (D) NOMO1 (i-shNT vs. i-shFADS1.1: total TG,  $****p<0.0001$ ; 20:4 TG,  $****p<0.0001$ ; 20:5 TG,  $****p<0.0001$ ; and i-shNT vs. i-shFADS1.2: 20:4 TG,  $**p=0.0028$ ; 20:5 TG,  $**p=0.0038$ ) and (E) MOLM14 cells (i-shNT vs. i-shFADS1.1:  $***total\ TG, p=0.0002$ ; 20:4 TG,  $*p=0.0391$ ; 20:5 TG,  $*p=0.0257$ ).

**Figure S4. FADS1 inhibition drives STING activation. (A)** Heatmap representation of the expression of genes identified to be differentially regulated between i-shNT and i-shFADS1.1 in the 'Response to Virus (GO\_UP)' signature in the top panel of Fig 5B. **(B)** qPCR analysis of the specified genes in i-shNT- and i-shFADS1.1-expressing MOLM14 cells at 40h post-doxycycline induction (i-shNT vs i-shFADS1.1: *IFIT1*,  $****p<0.0001$ ; *IFIT2*,  $****p<0.0001$ ; *IFIT3*,  $****p<0.0001$ ; *CXCL10*,  $**p=0.0024$ ; *IRF7*,  $***p=0.0001$ ;



*STAT2*, \*\*\* $p=0.0003$ ). **(C)** Cytoplasmic extracts from MOLM14-expressing i-shNT or i-shFADS1.1 and treated with DOX 40 hours earlier were subjected to enzyme-linked immunoabsorbent assay (ELISA) to detect cGAMP levels ( $p=0.0069$ ). **(D)** Gene Set Enrichment Analysis (GSEA) enrichment score curve of Toll-Like Receptor cascade genes in NOMO1 cells expressing i-shFADS1.1 vs i-shNT control. The analysis was performed using the Reactome Pathway Database. **(E)** Western blot analysis of NOMO1 (*left panel*) and MOLM14 (*right panel*) cells expressing i-shNT or i-shFADS1.1 with the indicated antibodies. The cells were harvested at 40h post-doxycycline induction. **(F)** Western blot analysis of THP-1 (*right panel*) and NOMO1 (*left panel*) cells co-expressing Cas9 and control (STING<sup>WT</sup>) or STING-targeting CRISPR guides (STING<sup>KO</sup>) with the indicated antibodies. **(G)** THP-1 STING<sup>WT</sup> (i.e. wild-type) and STING<sup>KO</sup> cells expressing i-shNT, i-shFADS1.1 or i-shFADS1.2 were analyzed for CD11b MFI (i-shNT vs i-shFADS1.1, \*\*\*\* $p<0.0001$ ; i-shNT vs i-shFADS1.2, \*\* $p=0.003$ ) using flow cytometry 4 days post-DOX induction. **(H)** cDNA recovered from THP-1-STING<sup>WT</sup>- and -STING<sup>KO</sup> cells expressing i-shNT or shFads1.1 were analyzed by qPCR for the expression of the indicated genes. The data is presented as the fold change (FC) in gene expression of i-shFADS1.1-expressing cells over i-shNT-expressing cells in each cellular genotype (STING<sup>WT</sup> vs STING<sup>KO</sup>: *IFIT1*, \*\*\*\* $p<0.0001$ ; *IFIT2*, \*\*\*\* $p<0.0001$ ; *IFIT3*, \*\*\*\* $p<0.0001$ ; *CXCL10*, \* $p=0.012$ ; *IRF7*, \*\*\*\* $p<0.0001$ ; *ISIG15*, \*\*\* $p=0.0007$ ).

**Figure S5. Pharmacological inhibition of FADS enzymes imparts anti-AML activity.**

**(A)** MLL-AF9 cells (*left panel*) and HSPCs (*right panel*) were treated with the indicated

concentrations of CP-24879 for 24 hours, washed and then plated in cytokine-enriched methylcellulose (10,000 for HSPCs or 500 MLL-AF9). Colonies were enumerated 7 days after plating (MLL-AF9: 0 vs. 25 $\mu$ M, \* $p$ =0.0206; and 0 vs. 50 $\mu$ M, \*\*\* $p$ =0.0009). **(B)** NOMO1 were treated with the indicated concentrations of CP-24879 for 48 hours and then assessed by flow cytometry for CD11b MFI (*left panel*, all comparisons, \*\*\*\* $p$ <0.0001) or % Annexin V<sup>+</sup> (*middle panel*: 0 vs. 12.5 $\mu$ M, \*\* $p$ =0.0066; 0 vs. 25 $\mu$ M, \*\* $p$ =0.0012; and 0 vs. 50 $\mu$ M, \*\*\*\* $p$ <0.0001). *Right panel*, vehicle and 25 $\mu$ M CP-24879-treated cells were subjected to Wright-Giemsa staining at 48h (100x magnification). **(C)** THP1 were treated with the indicated concentrations of CP-24879 for 48 hours and then assessed by flow cytometry for CD11b MFI (*left panel*: 0 vs. 12.5 $\mu$ M, \*\*\* $p$ =0.0007; 0 vs. 25 $\mu$ M, \*\*\*\* $p$ <0.0001; and 0 vs. 50 $\mu$ M, \*\*\*\* $p$ <0.0001) or % Annexin V<sup>+</sup> (*middle panel*: 0 vs. 25 $\mu$ M, \* $p$ =0.0294; and 0 vs. 50 $\mu$ M, \*\*\*\* $p$ <0.0001). *Right panel*, vehicle and 25 $\mu$ M CP-24879-treated cells were subjected to Wright-Giemsa staining at 48h (100x magnification). **(D)** THP-1 STING<sup>WT</sup> and STING<sup>KO</sup> cells were treated with the indicated concentration of CP-24978 for 48 hours and then analyzed for %Annexin V<sup>+</sup> by flow cytometry (STING<sup>WT</sup> vs. STING<sup>KO</sup>: 20 $\mu$ M vs. 20 $\mu$ M, \*\*\* $p$ =0.0002; 40 $\mu$ M vs. 40 $\mu$ M, \*\*\* $p$ =0.0006). **(E)** cDNA recovered from THP-1-STING<sup>WT</sup>- and -STING<sup>KO</sup> cells treated with vehicle or 40 $\mu$ M CP-24879 were analyzed by qPCR for the expression of the indicated genes. The data is presented as the fold change (FC) in gene expression of CP-24879-treated cells over vehicle-treated cells in each cellular genotype (STING<sup>WT</sup> vs STING<sup>KO</sup>: *IFIT1*, \* $p$ =0.0158; *IFIT2*, \*\* $p$ =0.003; *IFIT3*, \*\* $p$ =0.0011; *CXCL10*, \* $p$ =0.016; *IRF7*, \*\*\*\* $p$ <0.0001; *ISIG15*, \*\* $p$ =0.0086). **(F-H)** The indicated cells lines were treated with either increasing concentrations of CP-24879

or sc-26126 for 48 hours and then assessed for % Annexin V+ by flow cytometry: (F) NOMO1 (CP-24879 vs. sc-26126: 40 $\mu$ M vs. 40 $\mu$ M, \*\*\* $p=0.0006$ ); (G) MOLM14 (CP-24879 vs. sc-26126: 20 $\mu$ M vs. 20 $\mu$ M, \*\* $p=0.0103$ ); (H) THP-1 (CP-24879 vs. sc-26126: 10 $\mu$ M vs. 10 $\mu$ M, \* $p=0.0111$ ; 20 $\mu$ M vs. 20 $\mu$ M, \*\*\* $p=0.0004$ ; 40 $\mu$ M vs. 40 $\mu$ M, \*\*\* $p=0.0009$ ).

**(I-K)** The indicated cells lines were treated with either increasing concentrations of CP-24879 or sc-26126 for 48 hours and then assessed for CD11b MFI by flow cytometry: (I) NOMO1 (CP-24879 vs. sc-26126: 10 $\mu$ M vs. 10 $\mu$ M, \* $p=0.0281$ ; 20 $\mu$ M vs. 20 $\mu$ M, \*\*\* $p=0.0008$ ; 40 $\mu$ M vs. 40 $\mu$ M, \*\*\* $p=0.0004$ ); (J) MOLM14 (CP-24879 vs. sc-26126: 20 $\mu$ M vs. 20 $\mu$ M, \* $p=0.0105$ ; 40 $\mu$ M vs. 40 $\mu$ M, \*\*\*\* $p<0.0001$ ); (K) THP-1 (CP-24879 vs. sc-26126; 20 $\mu$ M vs. 20 $\mu$ M, \*\* $p=0.0086$ ; 40 $\mu$ M vs. 40 $\mu$ M, \*\*\* $p=0.0001$ ).

**Figure S6. Pharmacological inhibition of FADS enzymes reduced live cells of patient-derived AML samples but not that healthy BM-derived hematopoietic cells.**

**(A-F)** BM or PB samples recovered from patients diagnosed with AML were treated with the indicated concentrations of CP-24879 for 4 days and then analyzed by flow cytometry to count live AML cells. (A) AML-005: Live cell counts, 0 vs. 10 $\mu$ M, \* $p=0.0191$  and 0 vs. 20 $\mu$ M, \*\* $p=0.0017$ . (B) AML-006: Live cell counts, 0 vs. 5 $\mu$ M, \* $p=0.0139$  and 0 vs. 20 $\mu$ M, \*\* $p=0.005$ . (C) AML-007: Live cell counts, 0 vs. 10 $\mu$ M, \*\* $p=0.0028$  and 0 vs. 20 $\mu$ M, \*\*\* $p=0.0004$ . (D) AML-008: Live cell counts, 0 vs. 10 $\mu$ M, \* $p=0.0264$  and 0 vs. 20 $\mu$ M, \*\* $p=0.0055$ . (E) AML-009: No significant differences. (F) AML-010: Live cell counts, 0 vs. 10 $\mu$ M, \* $p=0.0216$  and 0 vs. 20 $\mu$ M, \*\*\* $p=0.0005$ . **(G)** BM samples recovered from healthy donor #3 were treated with the indicated concentrations of CP-24879 for 4 days and then

analyzed by flow cytometry to count live cells. Dots represent individual data points and error bars represent SD.

**Figure S7. STING agonism displays anti-leukemia activity but also reduces live granulocyte counts.** (A) THP-1-STING<sup>WT</sup> and -STING<sup>KO</sup> were treated with the indicated concentrations of diAZBI for 48 hours and then assessed for live cells (PI) by flow cytometry. (B-G) BM or PB samples recovered from patients diagnosed with AML were treated with the indicated concentrations of diAZBI for 4 days and then analyzed by flow cytometry to count live AML cells. (B) AML-005: Live cell counts, 0 vs. 5 $\mu$ M, \*\*\*p=0.0008, 0 vs. 10 $\mu$ M, \*\*\*p=0.0008 and 0 vs. 20 $\mu$ M, \*\*\*p=0.0007. (C) AML-006: Live cell counts, 0 vs. 10 $\mu$ M, \*\*p=0.0014 and 0 vs. 20 $\mu$ M, \*\*\*\*p<0.0001. (D) AML-007: No significant differences. (E) AML-008: Live cell counts, 0 vs. 5 $\mu$ M, \*\*\*p=0.0009, 0 vs. 10 $\mu$ M, \*\*\*p=0.0006 and 0 vs. 20 $\mu$ M, \*\*\*p=0.0007. (F) AML-009: Live cell counts, 0 vs. 5 $\mu$ M, \*\*p=0.004, 0 vs. 10 $\mu$ M, \*\*\*p=0.0009 and 0 vs. 20 $\mu$ M, \*\*\*\*p<0.0001. (G) AML-010: Live cell counts, 0 vs. 10 $\mu$ M, \*p=0.0494 and 0 vs. 20 $\mu$ M, \*\*\*p=0.0002. (H) BM samples recovered from healthy donors were treated with the indicated concentrations of diAZBI for 4 days and then analyzed by flow cytometry to count live CD45<sup>+</sup> cells. *Left panel*, HD-001. *Middle panel*, HD-002: 0nM vs. 0.312nM, \*p=0.0101; 0nM vs. 1.25nM, \*\*\*p=0.0001; 0nM vs. 5nM, \*\*\*\*p<0.0001). *Right panel*, HD-003: 0nM vs. 0.1nM, \*p=0.0466; 0nM vs. 1nM, \*p=0.0126; 0nM vs. 10nM, \*\*p=0.0085). (I) BM samples recovered from healthy donors were treated with the indicated concentrations of diAZBI for 4 days and then analyzed by flow cytometry to count CD14<sup>+</sup>CD16<sup>+</sup> granulocytes. *Left panel*, HD-001: 0nM

vs. 10nM, \*p=0.0149. *Middle panel*, HD-002: 0nM vs. 0.312nM, \*p=0.0101; 0nM vs. 1.25nM, \*\*\*p=0.0001; 0nM vs. 5nM, \*\*\*\*p<0.0001). *Right panel*, HD-003: 0nM vs. 1nM, \*p=0.0357; 0nM vs. 10nM, \*p=0.0285). **(J)** BM samples recovered from healthy donors were treated with the indicated concentrations of diAZBI for 4 days and then analyzed by flow cytometry to count CD19+ Lymphocytes. *Left panel*, HD-001: 0nM vs. 0.1nM, \*p=0.0281. *Middle panel*, HD-002. *Right panel*, HD-003.

**Figure S8. Pharmacological blockade of FADS cooperates with STING agonism on human AML cell lines.** **(A-D)** (A) NOMO1, (B) THP-1, (C) OCIAML2 and (D) OCI-AML3 cells were treated with the indicated concentrations of diAZBI and CP-24879. *Left panels* represent two-dimensional dose-response matrices indicating the percentage of inhibition of each combination of diAZBI (*y*-axis) and CP-24879 (*x*-axis). *Right panels* represent three-dimensional plots of the synergy/cooperation scores (*y*-coordinate) for each cell line treated with the indicated concentrations of STING agonist, diAZBI (*x*-coordinate) and CP-24879 (*z*-coordinate).

**Figure S9. STING agonism variably cooperates with FADS1 inhibition on patient-derived AML samples.** **(A)** Three dimensional plots of the synergy/cooperation scores (*y*-coordinate) for the indicated patient-derived AML samples treated with varying combinations of the STING agonist, diAZBI (*z*-coordinate) and CP-24879 (*x*-coordinate).

**(B)** Two-dimensional dose-response matrices indicating the percentage of inhibition of each combination of diAZBI (*x*-axis) and CP-24879 (*y*-axis) for each of the indicated patient-derived AML samples.

**Figure S10. STING agonism may have a potential therapeutic window in AML. (A)**

BM cells from HD-002 were treated with the indicated concentrations of diAZBI and CP-24879. *Top panel*, data are presented as the ratio of total live cell counts in each condition divided by the average cell count of vehicle-treated cells. *Middle panel*, data are presented as a ratio of total lymphocyte counts in each condition divided by the average cell count of vehicle-treated cells. *Bottom panel*, data are presented as a ratio of total granulocyte counts in each condition divided by the average cell count of vehicle-treated cells. **(B-L)** BM cells from HD-002 or the indicated AML patients were treated with the indicated concentrations of diAZBI or CP-24879 and the data in each panel is presented as the ratio of drug-treated to vehicle-treated live cell counts for each sample. The indicated samples were treated with the indicated concentrations of: *(B-C)* CP-24879; *(D, G and J)* diAZBI; or *(E, F, H, I, K and L)* CP-24879 and diAZBI.

**Figure S11. FADS1 inhibition disrupts FA monosaturation and reduces the expression of other enzymatic regulators of of FA synthesis. (A)**

Heatmap of total MS signals from 16:1 (*top panel*) and 18:1 (*bottom panel*) FA-containing lipid species. CL – Cardiolipin, SM – Sphingomyelin, ChE – Cholesteryl Ester, PA – Phosphatidic acid, PI – Phosphatidylinositol, PS – Phosphatidylserine, TG – Triglyceride, PE –

Phosphatidylethanolamine, PG – Phosphatidylglycerol, PC – Phosphatidylcholine, DG – Diglyceride, AcCa – Acyl carnitine, Cer – Ceramide, Hex1Cer – Hexosyl Ceramide with 1 hexose, Hex2Cer – Hexosyl Ceramide with 2 hexoses. **(B)** qPCR analysis of NOMO1 single cell clones for the specified genes: \*\*\*\*p<0.0001 for all indicated comparisons. **(C)** Same as in (B) but for MOLM14 cells: i-shNT vs. i-shFADS1, *FASN*, \*\*\*p=0.0002, *FADS1*, \*\*\*p=0.0002; i-shNT vs. i-shFADS1, *FASN*, \*\*p=0.0055; \*\*\*\*p<0.0001 for all other indicated comparisons.

**Figure S12. Summary of genes related to Type-I interferon Signaling that are mutated in pediatric AML. (A)** Landscape of genetic aberrations in type-1 IFN genes from pediatric AML patients. Each bar represents a patient sample. All data was extracted from the TARGET AML Initiative via cBioPortal (<https://www.cbioportal.org/>).

### Supplemental References

- [1] D. L. Stirewalt *et al.*, "Identification of genes with abnormal expression changes in acute myeloid leukemia," *Genes Chromosomes Cancer*, vol. 47, no. 1, pp. 8–20, Jan. 2008, doi: 10.1002/gcc.20500.
- [2] P. J. M. Valk, R. Delwel, and B. Löwenberg, "Gene expression profiling in acute myeloid leukemia," 2005.
- [3] "Genomic and Epigenomic Landscapes of Adult De Novo Acute Myeloid Leukemia," *New England Journal of Medicine*, vol. 368, no. 22, pp. 2059–2074, May 2013, doi: 10.1056/NEJMoa1301689.
